# Supplementary material for: Label-free detection of dam methyltransferase activity and inhibition via malachite green aptamer generated by T7 RNA polymerase
Source: Royal Society of Chemistry journal article supplement (doi:10.1039/d4nj05217j), 2025-01-01
Supplement: d4nj05217j1.pdf [file d4nj05217j1.pdf]

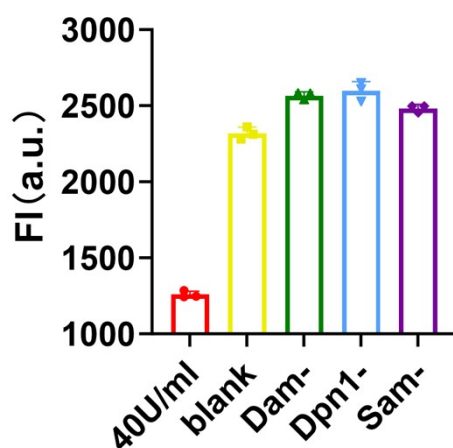

**Figure S1.** The difference in fluorescence intensity at 650 nm with an excitation wavelength of 616 nm in different conditions: control (yellow column), 40 U/mL Dam MTase (red column), without Dam MTase (green column), without DpnI (blue column) and without SAM (purple column).

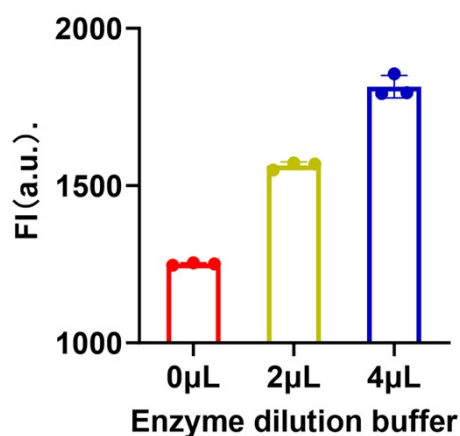

**Figure S2.** Fluorescence spectra corresponding The effect of enzyme storage solution on the reaction system. An additional 0µL, 2µL, 4µL of glycerol-containing enzyme dilution buffer was added to the reaction system.

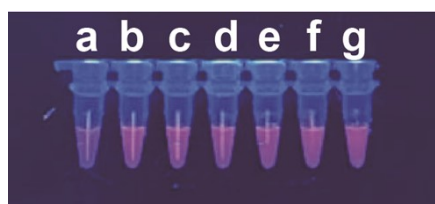

**Figure S3.** The fluorescence under the UV lamp with an excitation wavelength of 616nm with different concentrations of Dam MTase, from a to g, 40, 4, 0.4,  $4 \times 10^{-2}$ ,  $4 \times 10^{-3}$ ,  $4 \times 10^{-4}$ , 0 U/mL, respectively.

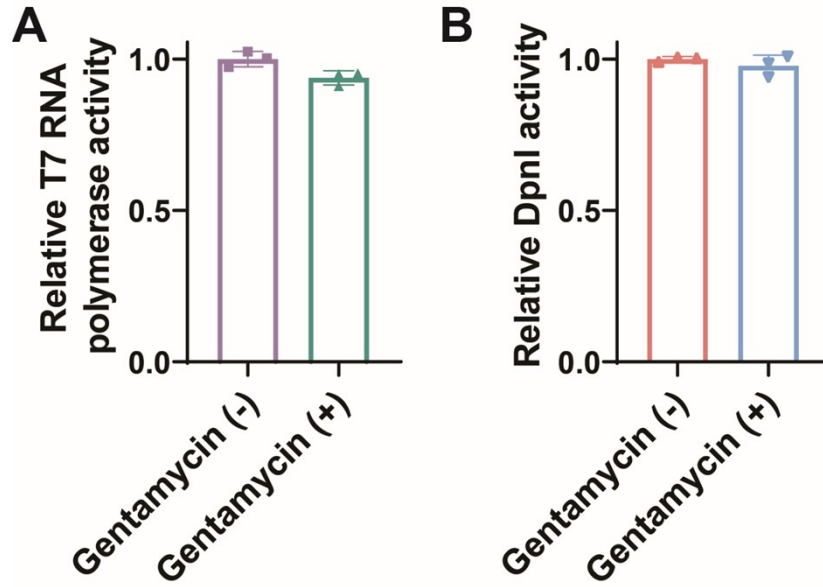

**Figure S4.** (A) Add gentamycin (5  $\mu$ M) in the transcription stage. The relative T7 RNA polymerase activity in different conditions: without gentamycin (purple column), with gentamycin (green column). (B) Add gentamycin (5  $\mu$ M) in the cleavage stage after methylation by Dam MTase (40 U/mL). The relative DpnI activity in different conditions: without gentamycin (red column), with gentamycin (blue column). Error bars represent the standard deviation of the three replicates.

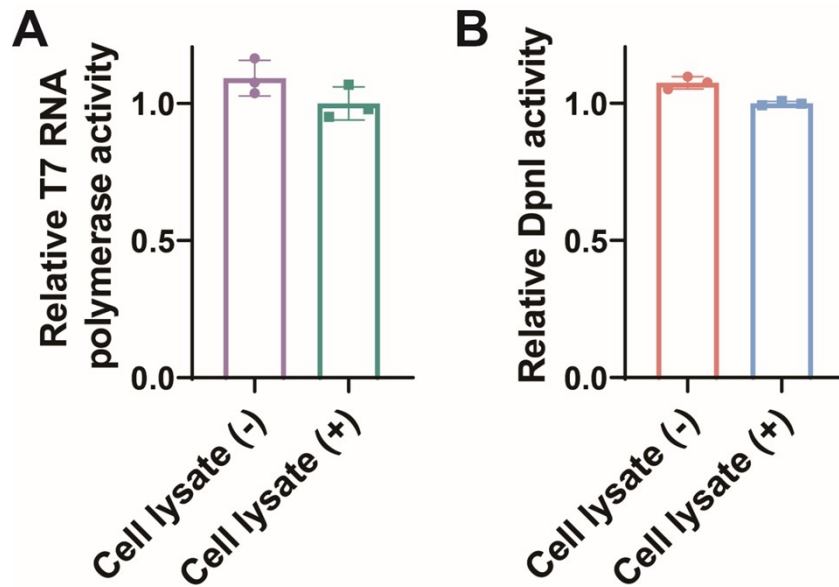

**Figure S5.** The influence of the cell lysate on DpnI and T7 RNA polymerase. (A) The relative T7 RNA polymerase activity in different conditions: without cell lysate (purple column), with cell lysate (green column) (A) Add cell lysate (2  $\mu$ L) in the cleavage stage after methylation by Dam MTase (40 U/mL). The relative DpnI activity in different conditions: without cell lysate (red column), with cell lysate (blue column). Error bars represent the standard deviation of the three replicates.

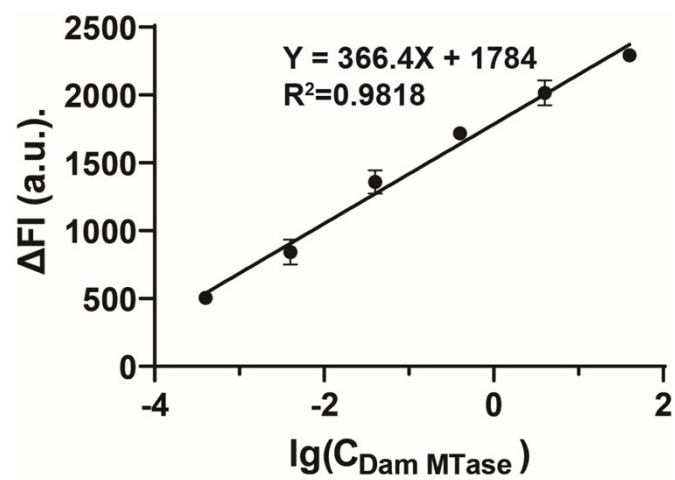

**Figure S6.** The linear correlation of the fluorescence intensity versus  $\lg C_{\text{Dam MTase}}$  with the equation being:  $\Delta F = 366.4 \times \lg C_{\text{Dam MTase}} + 1784$  ( $R^2=0.9818$ )
